# Supplementary material
Source: publisher site journal article supplement (https://study.sagepub.com/sites/default/files/appendix_1c.pdf)
Supplement: Supplementary file 1 [file appendix_1c.pdf]

**NON-WORD READING TEST**

|                  |                |                |                |                 |
|------------------|----------------|----------------|----------------|-----------------|
| <b>nid</b>       | <b>fod</b>     | <b>jud</b>     | <b>tek</b>     | <b>mab</b>      |
| <b>kep</b>       | <b>zid</b>     | <b>hev</b>     | <b>gan</b>     | <b>rox</b>      |
|                  |                |                |                |                 |
| <b>sta</b>       | <b>spov</b>    | <b>flet</b>    | <b>trag</b>    | <b>blen</b>     |
| <b>plig</b>      | <b>clum</b>    | <b>snat</b>    | <b>sked</b>    | <b>grob</b>     |
|                  |                |                |                |                 |
| <b>jund</b>      | <b>vung</b>    | <b>bilk</b>    | <b>wist</b>    | <b>famp</b>     |
| <b>melf</b>      | <b>yalp</b>    | <b>masp</b>    | <b>donk</b>    | <b>sesk</b>     |
|                  |                |                |                |                 |
| <b>chon</b>      | <b>thid</b>    | <b>whad</b>    | <b>shev</b>    | <b>mich</b>     |
| <b>heth</b>      | <b>kush</b>    | <b>quon</b>    | <b>hoth</b>    | <b>frang</b>    |
|                  |                |                |                |                 |
| <b>genned</b>    | <b>junting</b> | <b>stibbed</b> | <b>fondwin</b> | <b>palkened</b> |
| <b>danlerwin</b> | <b>etc.</b>    |                |                |                 |

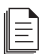**Photocopiable**

*Assessment of Learners with Dyslexic-Type Difficulties 2e* © 2018 Sylvia Phillips and Kathleen Kelly (Sage: London).
